# Supplementary material
Source: PubMed Central journal article supplement (PMC4362883)
Supplement: NIHMS627466-supplement-supplement_1.pdf [file NIHMS627466-supplement-supplement_1.pdf]

Table 1. Association of plasma A $\beta$  levels with risk of incident dementia and Alzheimer's disease (Model A+)

|                                                                |          | Continuous (per SD) |             |                        | Quartile 1 |             | Quartile 2 |             | Quartile 3 |             | Quartile 4 |
|----------------------------------------------------------------|----------|---------------------|-------------|------------------------|------------|-------------|------------|-------------|------------|-------------|------------|
|                                                                |          | HR                  | 95% CI      | P                      | HR         | 95% CI      | HR         | 95% CI      | HR         | 95% CI      | HR         |
| A $\beta$ <sub>1-40</sub>                                      | AD       | 0.99                | [0.84-1.16] | 8.93x10 <sup>-01</sup> | 1.00       | [0.60-1.65] | 1.67       | [1.08-2.58] | 1.18       | [0.73-1.90] | Ref.       |
|                                                                | Dementia | 0.97                | [0.85-1.12] | 7.14x10 <sup>-01</sup> | 1.23       | [0.80-1.90] | 1.50       | [1.00-2.24] | 1.38       | [0.91-2.09] | Ref.       |
| A $\beta$ <sub>1-42</sub>                                      | AD       | 0.79                | [0.69-0.92] | 2.30x10 <sup>-03</sup> | 2.30       | [1.42-3.72] | 1.57       | [0.96-2.59] | 1.75       | [1.08-2.81] | Ref.       |
|                                                                | Dementia | 0.81                | [0.71-0.93] | 2.40x10 <sup>-03</sup> | 1.96       | [1.30-2.96] | 1.26       | [0.81-1.94] | 1.44       | [0.95-2.18] | Ref.       |
| A $\beta$ <sub>1-42</sub> / A $\beta$ <sub>1-40</sub><br>ratio | AD       | 0.80                | [0.68-0.93] | 4.50x10 <sup>-03</sup> | 1.78       | [1.13-2.81] | 1.64       | [1.03-2.59] | 1.39       | [0.85-2.29] | Ref.       |
|                                                                | Dementia | 0.83                | [0.72-0.96] | 9.80x10 <sup>-03</sup> | 1.68       | [1.12-2.52] | 1.52       | [1.01-2.29] | 1.41       | [0.91-2.17] | Ref.       |

Abbreviation: AD, Alzheimer's disease; HR, Hazard ratio; SD, Standard deviation; 95% CI, 95% Confidence interval; Ref., Reference

NOTE. Hazard ratios, confidence intervals and P-value were evaluated in Cox regression models

Model adjusted for age, gender and creatinine levels
